# Supplementary material for: Aspirin is Involved in the Cell Cycle Arrest, Apoptosis, Cell Migration, and Invasion of Oral Squamous Cell Carcinoma
Source: PubMed Central journal article supplement (PMC6073368; doi:10.3390/ijms19072029), 2018-07-12
Supplement: ijms-19-02029-s001.pdf [file ijms-19-02029-s001.pdf]

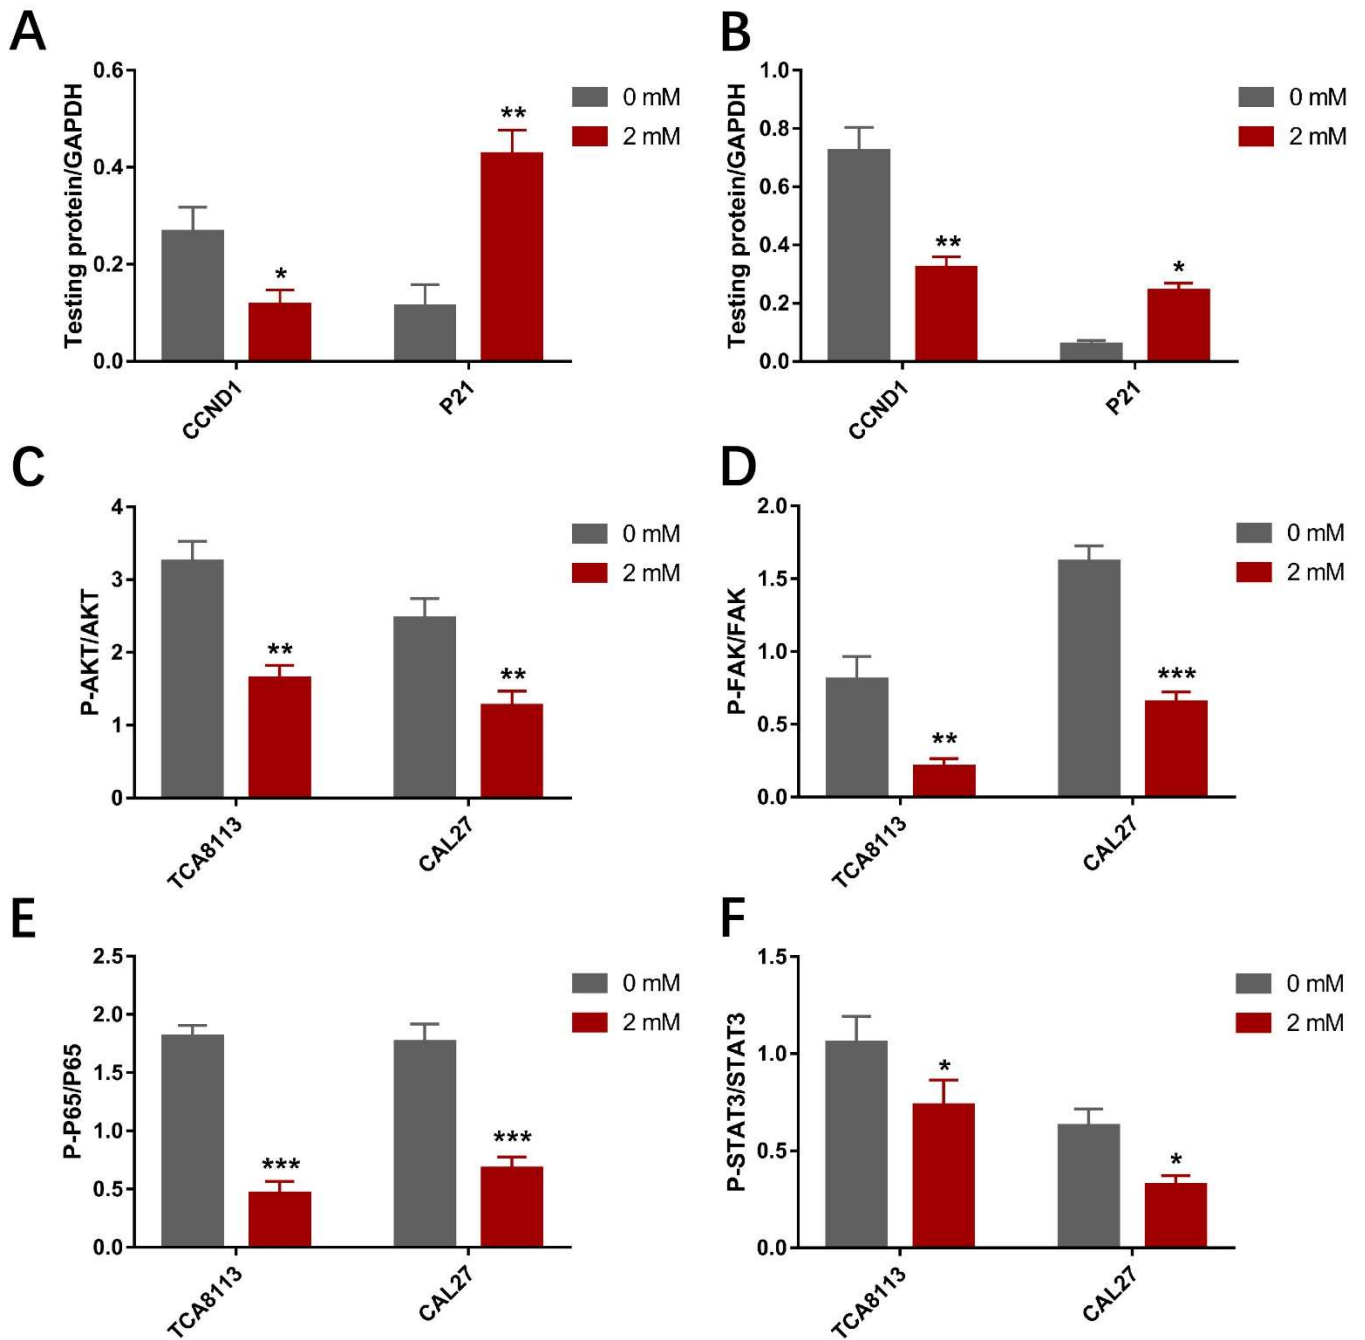

**Figure S1 Qualification and statistics for the results of Western-Blot** (A-B) The bar graph shows the gray value analysis of CyclinD1, and P21 for TCA8113 and CAL27 respectively. Data are mean  $\pm$  SD (error bars) from three independent experiments. (C) The bar graph shows the gray value analysis of AKT and P-AKT. Data are mean  $\pm$  SD (error bars) from three independent experiments. (D) The bar graph shows the gray value analysis of FAK and P-FAK. Data are mean  $\pm$  SD (error bars) from three independent experiments. (E) The bar graph shows the gray value analysis of P65 and P-P65. Data are mean  $\pm$  SD (error bars) from three independent experiments. (F) The bar graph shows the gray value analysis of STAT3 and P-STAT3. Data are mean  $\pm$  SD (error bars) from three independent experiments. \* $P < 0.05$ , \*\* $P < 0.01$ , \*\*\* $P < 0.001$

# CDC20

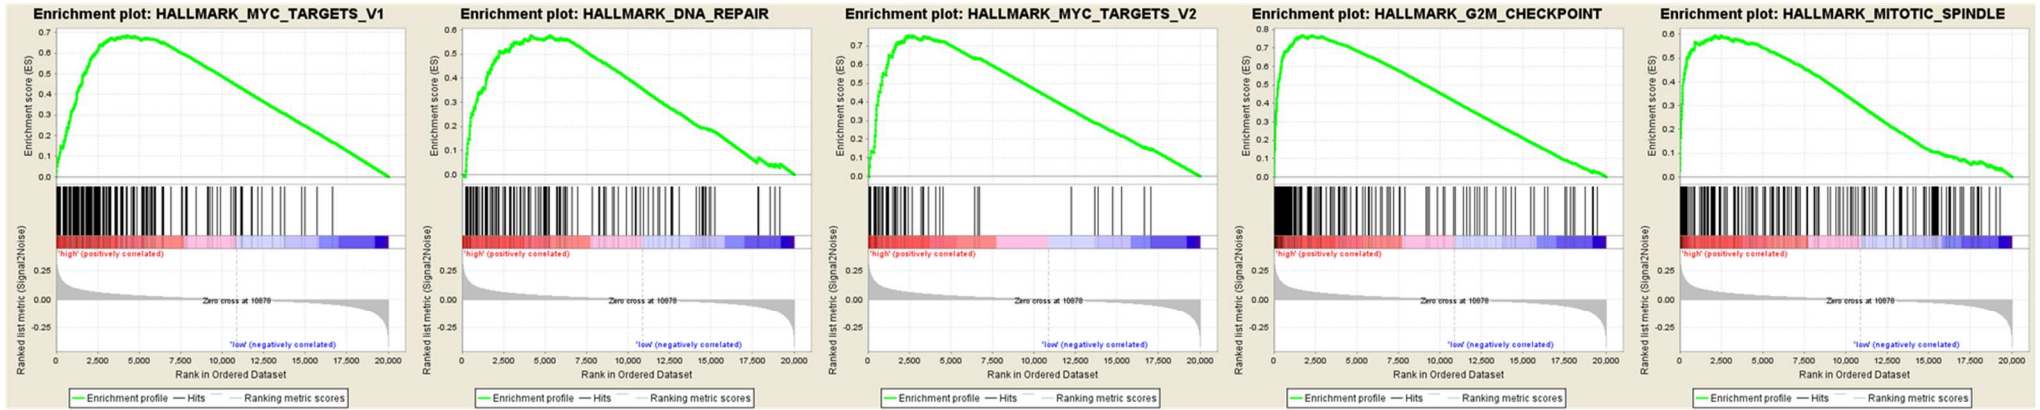

# CCNB2

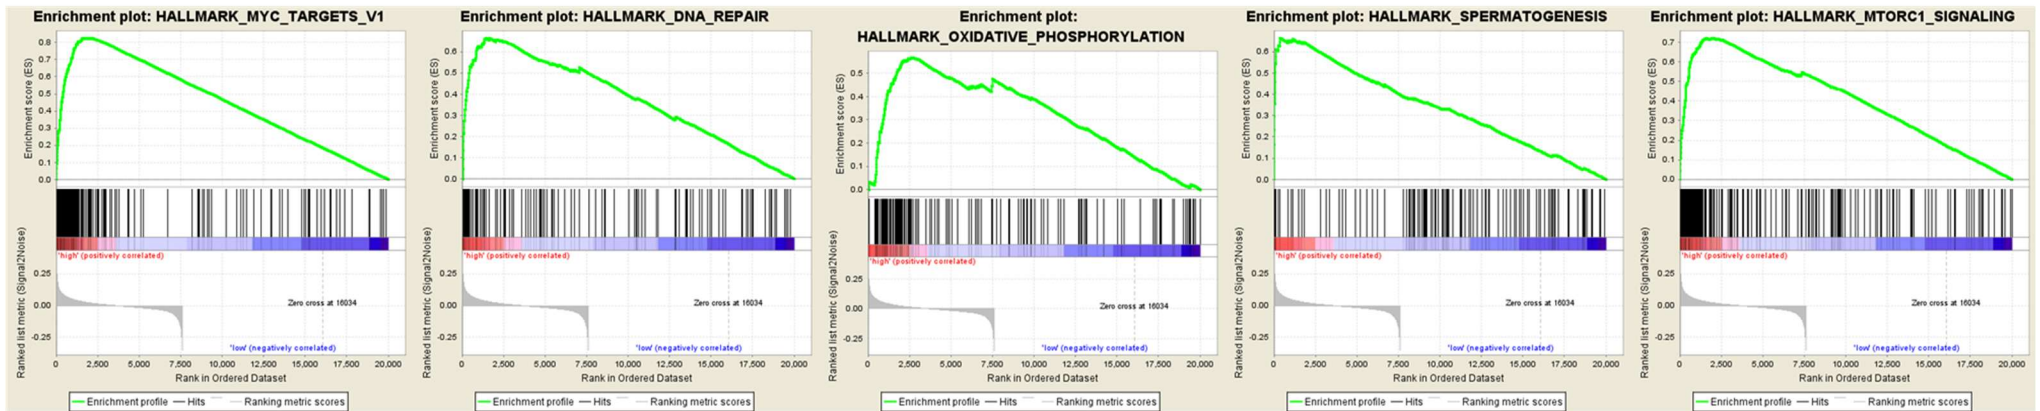

# BUB1

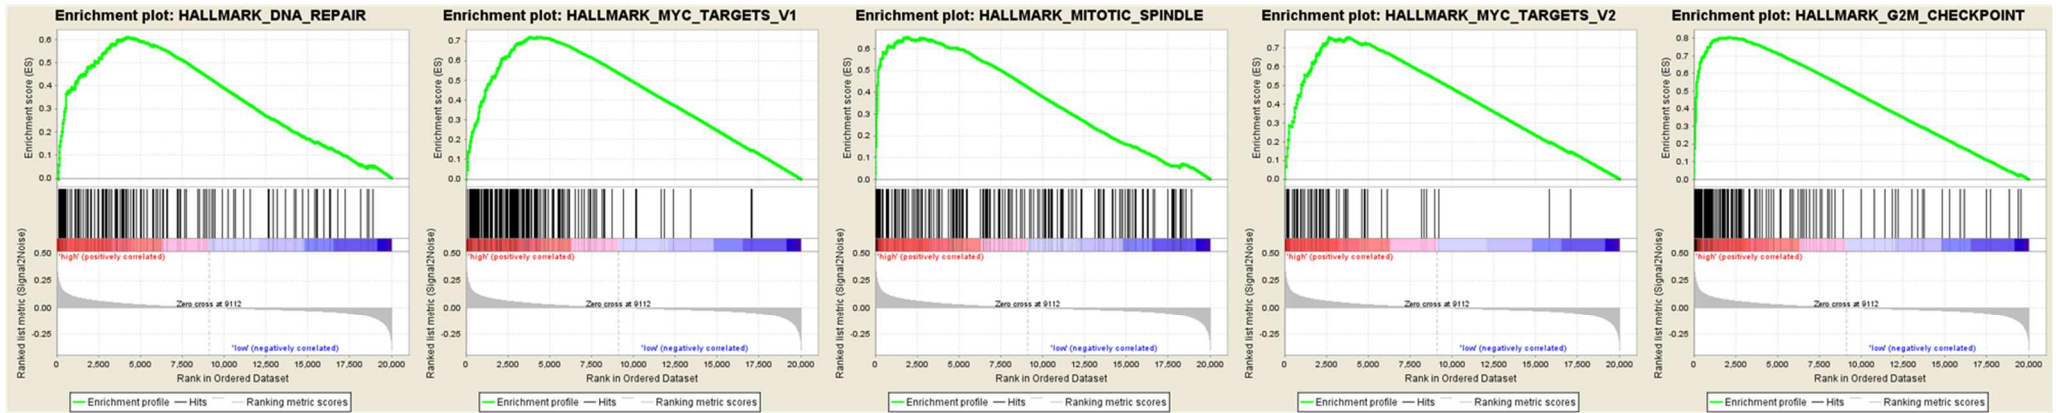

# KIF4A

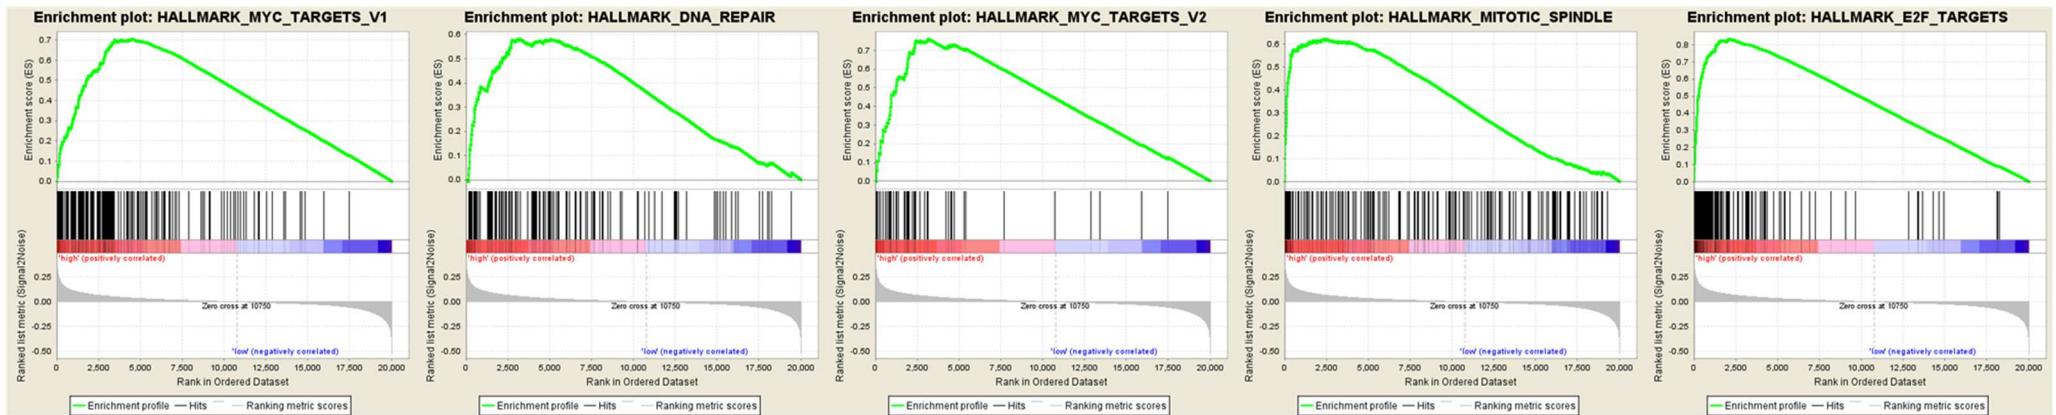

# OAS1

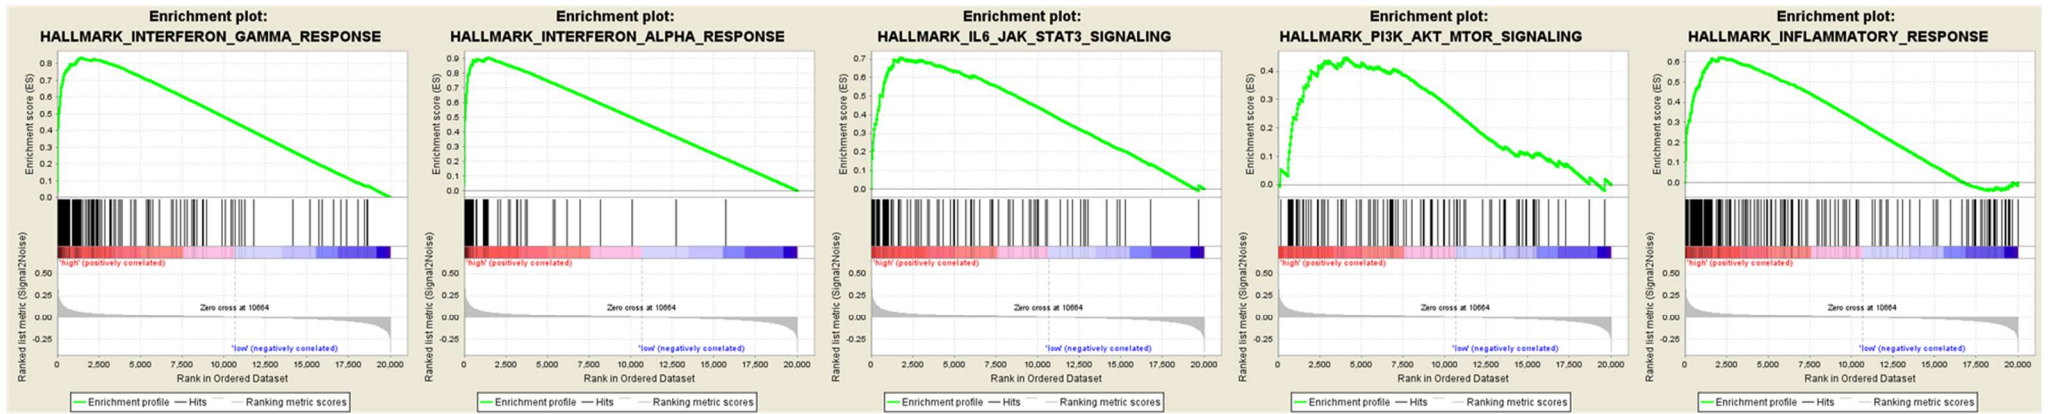

# KIF14

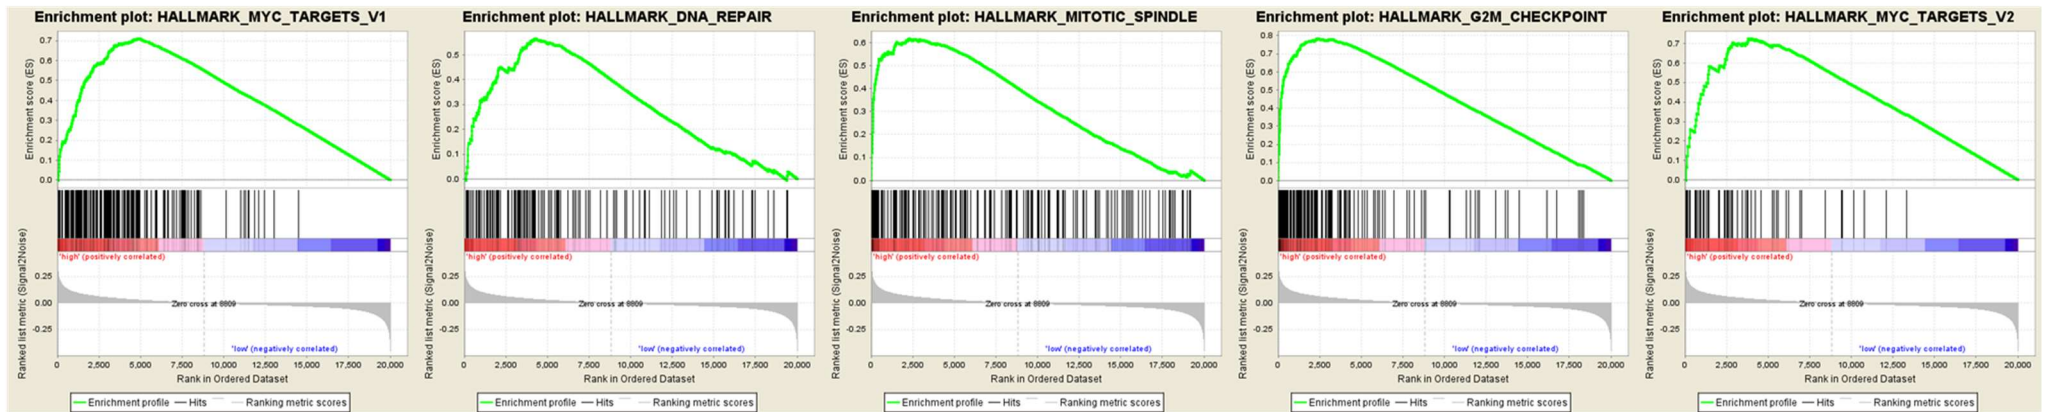

# AURKA

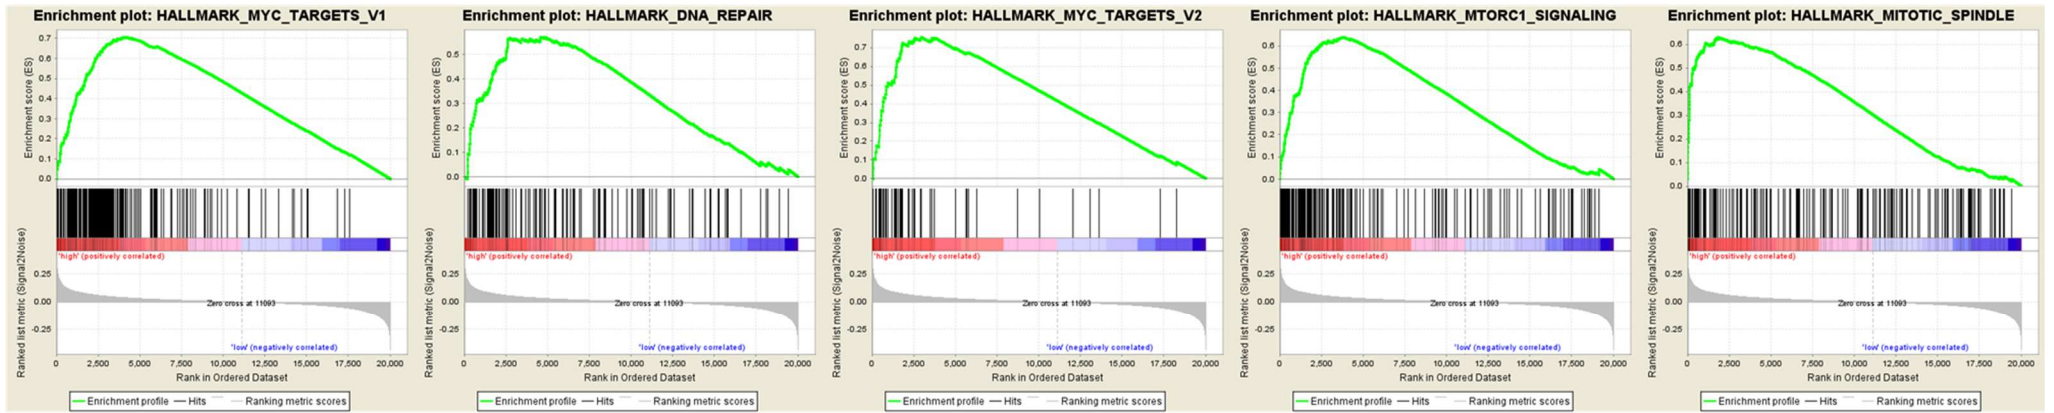

# KIF20A

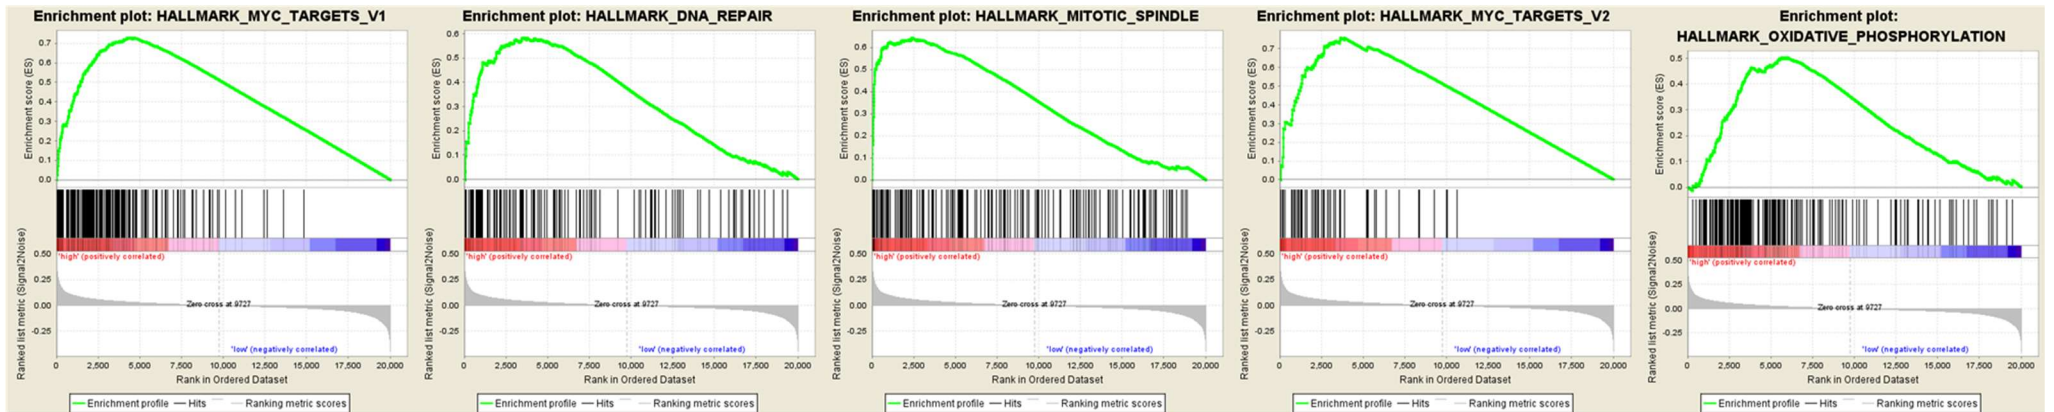

# FOXM1

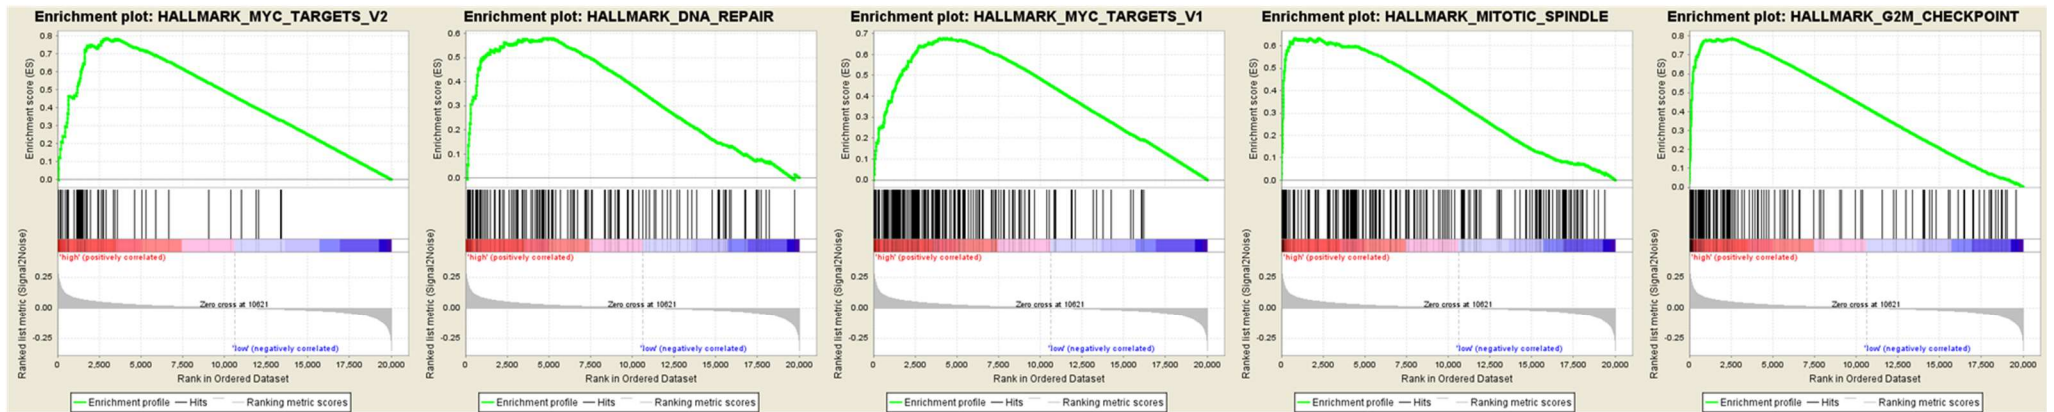

# IFIT3

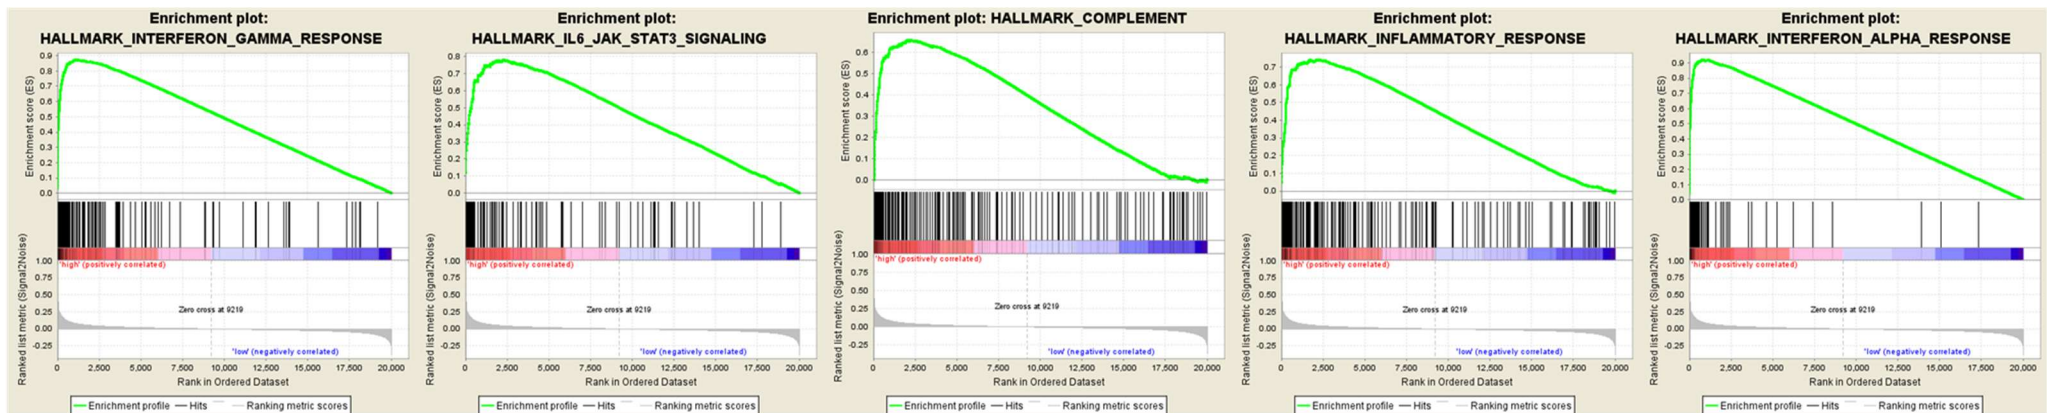

**Figure S2 The GSEA analysis of the 10 hub genes to revealed their function.** The dataset GSE30784 which contains 167 OSCC samples were downloaded from GEO database to perform GSEA analysis. The ten hub genes were divided into two groups according to their expression respectively (84 high expression group and 83 low expression group). The hallmark gene sets (h.all.v6.1.symbols.gmt) were used to show the function of the ten hub genes.
